# Supplementary material for: Gene Deletion by Fluorescence-Reported Allelic Exchange Mutagenesis in Chlamydia trachomatis
Source: PubMed Central journal article supplement — mBio. 2016 Jan 19;7(1):e01817-15. doi: 10.1128/mBio.01817-15 (PMC4725004; doi:10.1128/mbio.01817-15), 2016-01-19
Supplement: mbo001162632st1.pdf [file mbo001162632st1.pdf]

**Table S1. Primers**

| Name               | Sequence (5' to 3')                                          | Function                                                                                 |
|--------------------|--------------------------------------------------------------|------------------------------------------------------------------------------------------|
| pgp6 away F        | GGGGCTAGCGGGATTGATTTTACGAGAGAGATTGCG                         | Delete <i>pgp6</i> from pBOMB4-Tet-mCherry                                               |
| pgp6 away R        | GGGGCTAGCTCAGCTTGCCTCTGAGAGTAATC                             |                                                                                          |
| pgp6@mCherry F     | GAGAAAGGATCTGCGGCCGCATGAACAACTAAAAAAGAAGCGAATGTC             | Insert <i>pgp6</i> into pBOMB4-Tet-mCherry                                               |
| pgp6@mCherry R     | GAATGGTCGACCGGTACCTGCAGTGACCGAGGATCAGCTCTTTTGC               |                                                                                          |
| gfp@pUC19 F        | GGTGCCTCACTGATTAAGCATTGGTAAGATGCCCGACGGTCTTTATAGCGG          | Insert <i>gfp</i> into pUC19                                                             |
| gfp@pUC19 R        | GGTAACAGGATTAGCAGAGCGAGGTTACTTGTATAGTTTCCATGCCATGTG          |                                                                                          |
| mCherry@gfp F      | GGTTTTTATCAAATTTACAAAAGGAAGCCGATCTAGATGGTCTTAAGGGCCGAGGAAGAC | Replace <i>gfp</i> with <i>mCherry</i> in pBOMB4-Tet-mCherry                             |
| mCherry@gfp R      | CGCCCCGCCCTGCCACTCATCGTATTTGTACAGCTCATCCATGCCACCGG           |                                                                                          |
| aadA F             | CCGAAGCTTATCATCATGCCTCCTCTAGACC                              | Insert <i>aadA</i> into pUC18                                                            |
| aadA R             | CCGAAGCTTGAGGGTATTTGCCGACTACCTTG                             |                                                                                          |
| trpA@pUC18A F      | GGTCTGACGCTCAGTGGAACCGCAGAGCGGTTGAGTGCTATTT                  | Insert <i>trpA</i> +3kbp into pUC18A                                                     |
| trpA@pUC18A R      | CTGGCGTTACCCAACCTAATCGCCGCTCTTGTGGTTTCGGCATTG                |                                                                                          |
| ctl0063@pUC18A F   | GGTCTGACGCTCAGTGAACCGGCATGTGGTTGCTGCTGTTTGTG                 | Insert <i>ctl0063</i> +3kbp into pUC18A                                                  |
| ctl0063@pUC18A R   | CTGGCGTTACCCAACCTAATCGCCCTCCCTTTCAACTCCTCATTGCTATCC          |                                                                                          |
| ctl0064@pUC18A F   | GGTCTGACGCTCAGTGAACCGGGAGGACTAGGTTTGTGGTTGCGG                | Insert <i>ctl0064</i> +3kbp into pUC18A                                                  |
| ctl0064@pUC18A R   | CTGGCGTTACCCAACCTAATCGCCACGGGAGAGACATCGTAGAATTTT             |                                                                                          |
| ctl0065@pUC18A F   | GGTCTGACGCTCAGTGAACCGCCATCTTCCAGTGGATGCGAAGGT                | Insert <i>ctl0065</i> +3kbp into pUC18A                                                  |
| ctl0065@pUC18A R   | CTGGCGTTACCCAACCTAATCGCCGATCAAAGATAATCCGTTGGGGCTG            |                                                                                          |
| trpA away F        | GGGGGCGCGCTTTTGAATATGAATATGAAGCCAGGCATCG                     | Delete <i>trpA</i>                                                                       |
| trpA away R        | GGGGGCGCGCCAAATTCCTCTGTTTCTGCGGATGATTTGTGG                   |                                                                                          |
| ctl0063 away F     | GGGGGCGCGCCTAAAGAGAAGGTATACGGTGTTCGGTCC                      | Delete <i>ctl0063</i>                                                                    |
| ctl0063 away R     | GGGGGCGCGCCATAAATCCTCCGCCGAAGCAATAAC                         |                                                                                          |
| ctl0064 away F     | GGGGGCGCGCCGGAAATATCTAAGAACATTTTCTAATAGGGAAGAGG              | Delete <i>ctl0064</i>                                                                    |
| ctl0064 away R     | GGGGGCGCGCCTACTACTTCTCTTAATAGTTGAAAGGACCG                    |                                                                                          |
| ctl0065 away F     | GGGGGCGCGCCGCTGTCTGTGAAGAAGAGCAGATAGGACACAC                  | Delete <i>ctl0065</i>                                                                    |
| ctl0065 away R     | GCCGGCGCGCCATAAAGGATTTAGGTCTTTTGCCTATTCTTCAC                 |                                                                                          |
| bla-gfp F          | GGGGGCGCGCCGAAATGTGCGCGGAACCC                                | Amplify <i>bla-gfp</i> cassette                                                          |
| bla-gfp R          | GGGGGCGCGCCTTACTTGTATAGTTTCATCCATGCCATGTG                    |                                                                                          |
| homRR@pSUMC F      | CTGCAGGTACCGGTGACCATTCGGTCTGACGCTCAGTGAACG                   | Insert homologous recombination targeting region into pSUMC                              |
| homRR@pSUMC R      | GATCTTTTACGGGGTCTGACGCTCCTGGCGTTACCCAACCTAATCGCC             |                                                                                          |
| aadA@pBOMB F       | CAGCTCATCCATGCCACCGGTAGATCATCATGCCTCCTCTAGACC                | Insert <i>aadA</i> into pBOMB4-Tet-mCherry                                               |
| aadA@pBOMB R       | CACGGATCCGACGCTTAAAGACCCGAGGGTATTTGCCGACTACCTTG              |                                                                                          |
| mCherry@pBOMB F    | TGCCTCACTGATTAAGCATTGGTAACGTGCGATGCCGACGGTCTTATAGCGG         | Insert <i>mCherry</i> into pBOMB4-Tet-mCherry                                            |
| mCherry@pBOMB R    | CTCAGAAGATCTTTGATCTTTCTACGGGGTACTTGTACAGCTCGTCCATGCCG        |                                                                                          |
| trpA@gfp F         | CAAAAGGAAGCCGATCTAGTTGAGTAAAGGAGATGAGTAAATTAACCCAAAGTTTTAAAC | Replace <i>gfp</i> with <i>trpA</i> in pCOMa                                             |
| trpA@gfp R         | GCCCCGCCCTGCCACTCATCGTATCCAGGAATAACTGTTTGTGC                 |                                                                                          |
| surround trpA F    | CATTGGAGTCTTACATGCTCTCG                                      | Amplify sequence surrounding <i>trpA</i>                                                 |
| surround trpA R    | TCTATACAGACAACCTATGAAGCCAGATA                                |                                                                                          |
| surround ctl0063 F | TAGTAGCTCTTGACGGGTGTGCTT                                     | Amplify sequence surrounding <i>ctl0063</i>                                              |
| surround ctl0063 R | TACTACTTCTCTTAAATAGTTGAAAGGACCG                              |                                                                                          |
| surround ctl0064 F | TAAAGAGAAGGTATACGGTGTTCGGTCC                                 | Amplify sequence surrounding <i>ctl0064</i>                                              |
| surround ctl0064 R | CATATAAGGATTTAGGTCTTTTGCCTATTCTTCAC                          |                                                                                          |
| surround ctl0065 F | GGGAATATCTAAGAACATTTTCTAATAGGGAAGAGG                         | Amplify sequence surrounding <i>ctl0065</i>                                              |
| surround ctl0065 R | TGGATTAGGAGAACGCAAGCTGC                                      |                                                                                          |
| gapdh s            | CCTGGAGAACCTGCCAAGTATG                                       | Amplify <i>Mus musculus gapdh</i> by qPCR                                                |
| gapdh α-s          | AGACAACCTGGTCTCAGTGTA                                        |                                                                                          |
| 16S s              | CCTGGTAGTCTTGGCGTAAAC                                        | Amplify <i>C. trachomatis</i> L2 16S by qPCR                                             |
| 16S α-s            | TACTCCTCAGGCGGCATACTTA                                       |                                                                                          |
| pgp7 s             | GACAACGCTTCAAAGAAGATGGCTCTAATATAG                            | Amplify junction between <i>pgp7</i> and <i>pgp8</i> from the native pL2 plasmid by qPCR |
| pgp8 α-s           | CCTCTAGTACAAACACCCCAATATTGTG                                 |                                                                                          |
| gfp s              | GTGCCATGCCGAAGGTTAT                                          | Amplify <i>gfp</i> by qPCR                                                               |
| gfp α-s            | CTTCAGCACGTGTCTTGTAGTTC                                      |                                                                                          |
| mCherry s          | AGATCAAGCAGAGGCTGAAGCTGA                                     | Amplify <i>mCherry</i> by qPCR                                                           |
| mCherry α-s        | ACTGTTCCACGATGGTGTAGTCTT                                     |                                                                                          |
| trpA s             | GACGCGGAATAAATGGTGTGT                                        | Amplify <i>trpA</i> by qPCR                                                              |
| trpA α-s           | GGCGTTGTCCTGCAGAAAT                                          |                                                                                          |
| ctl0063 s          | TAACTATCTGTGGGAGGGAAG                                        | Amplify <i>ctl0063</i> by qPCR                                                           |
| ctl0063 α-s        | GGCATCTACCGTAGGATCTGTA                                       |                                                                                          |
| ctl0064 s          | TTCGGAGCTCATAGGAGAACT                                        | Amplify <i>ctl0064</i> by qPCR                                                           |
| ctl0064 α-s        | GCTCATTACAGGAGGGAATAC                                        |                                                                                          |
| ctl0065 s          | TCGTAGAGGTTCTGCTAGCCTTT                                      | Amplify <i>ctl0065</i> by qPCR                                                           |
| ctl0065 α-s        | TCGGTAATCACGCCTCCGATAA                                       |                                                                                          |
